# Supplementary material
Source: MDPI journal article supplement (https://www.mdpi.com/2311-7524/7/7/178)
Supplement: s1 [file s1]

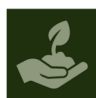

## Supplementary Materials

**Table S1.** Statistically significant differences (*lme* model) for main effects and interactions for the total shoot length and total number of shoots of inoculated and uninoculated *Ajania* plants treated with different phosphorus levels in 2015.

| Main effect/interaction <sup>a</sup> | df | Total shoot length | Total number of shoots |
|--------------------------------------|----|--------------------|------------------------|
| I                                    | 1  | NS                 | NS                     |
| P                                    | 3  | NS                 | NS                     |
| T                                    | 1  | ***                | **                     |
| I×P                                  | 3  | NS                 | NS                     |
| I×T                                  | 1  | NS                 | NS                     |
| P×T                                  | 3  | NS                 | NS                     |
| I×P×T                                | 3  | NS                 | NS                     |

<sup>a</sup>*lme* – I, inoculum; P, phosphorus treatment, T, time; ×, interaction; \*\*, statistically significant differences at  $p < 0.01$ ; \*\*\*, statistically significant differences at  $p < 0.001$ ; NS, not significant; df, degrees of freedom.

**Table S2.** Statistically significant differences (*lme* model) for main effects and interactions for the total shoot length and total number of shoots of inoculated and uninoculated *Ajania* plants treated with different phosphorus levels in 2016.

| Main effect/interaction <sup>a</sup> | df | Total shoot length | Total number of shoots |
|--------------------------------------|----|--------------------|------------------------|
| I                                    | 1  | NS                 | NS                     |
| P                                    | 3  | NS                 | NS                     |
| T                                    | 1  | ***                | ***                    |
| I×P                                  | 3  | NS                 | NS                     |
| I×T                                  | 1  | NS                 | **                     |
| P×T                                  | 3  | NS                 | ***                    |
| I×P×T                                | 3  | *                  | NS                     |

<sup>a</sup>*lme* – I, inoculum; P, phosphorus treatment, T, time; ×, interaction; \*, statistically significant differences at  $p < 0.05$ ; \*\*, statistically significant differences at  $p < 0.01$ ; \*\*\*, statistically significant differences at  $p < 0.001$ ; NS, not significant; df, degrees of freedom.
